# Supplementary material for: Target of rapamycin complex 2–dependent phosphorylation of the coat protein Pan1 by Akl1 controls endocytosis dynamics in Saccharomyces cerevisiae
Source: J Biol Chem. 2018 Jun 12;293(31):12043–53. doi: 10.1074/jbc.RA117.001615 (PMC6078453; doi:10.1074/jbc.RA117.001615)
Supplement: Supporting Information [file supp_RA117.001615_134887_2_supp_150685_pv83gr.pdf]

## SUPPORTING INFORMATION

## Supplemental figure 1

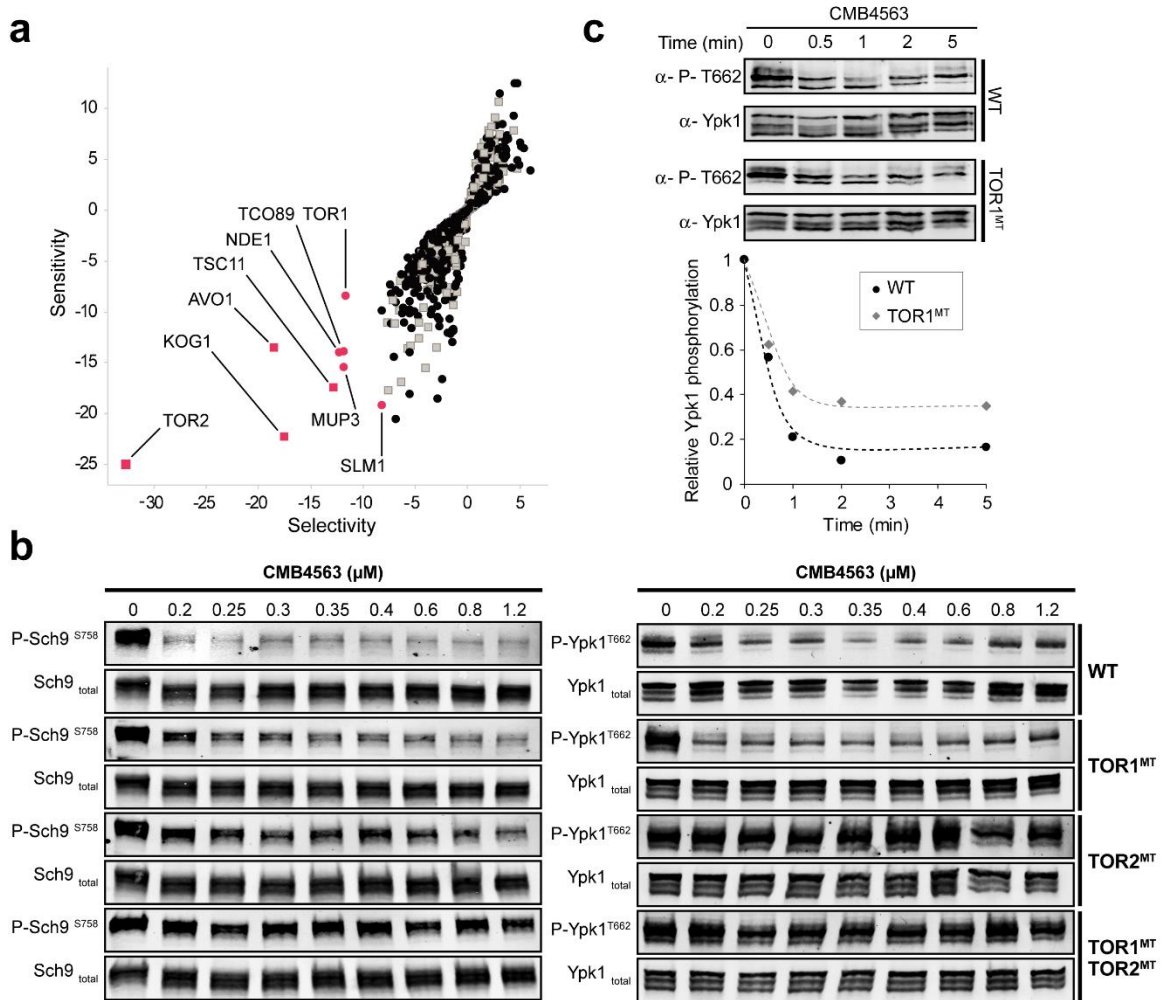

**Supplemental figure 1: CMB4563 is a potent and fast inhibitor of TOR1 and TORC2. a,** Heterozygous single deletion mutant strains covering 6200 genes (Open Biosystems) were grown as a pool in the presence or absence of 0.5  $\mu$ M CMB4563 for 20 generations. The relative abundances of the individual strains were then compared. Sensitivity of individual deletion mutants are observed on the vertical axis and associated with a selectivity on the horizontal axis which was determined by statistical analysis to correct for how frequently particular mutants scored in multiple assays. The most selective and sensitive strains are found in the bottom left corner (1). **b,** Western blots assessing the respective activity of TORC1 and TORC2 after 12-minute CMB4563 treatments to cells of the indicated genotypes. The corresponding merge channels version is in Fig. 1d. TORC1 activity is followed by Sch9<sup>P-S758</sup> and TORC2 by Ypk1<sup>P-T662</sup> phosphorylation. **c,** Western blot and corresponding quantification assessing the kinetics of Ypk1<sup>T662</sup> dephosphorylation in *TOR1*<sup>WT</sup> and *TOR1*<sup>MT</sup> strains with 0.8  $\mu$ M CMB4563 treatment at indicated time points (above, minutes).

Supplemental figure 2

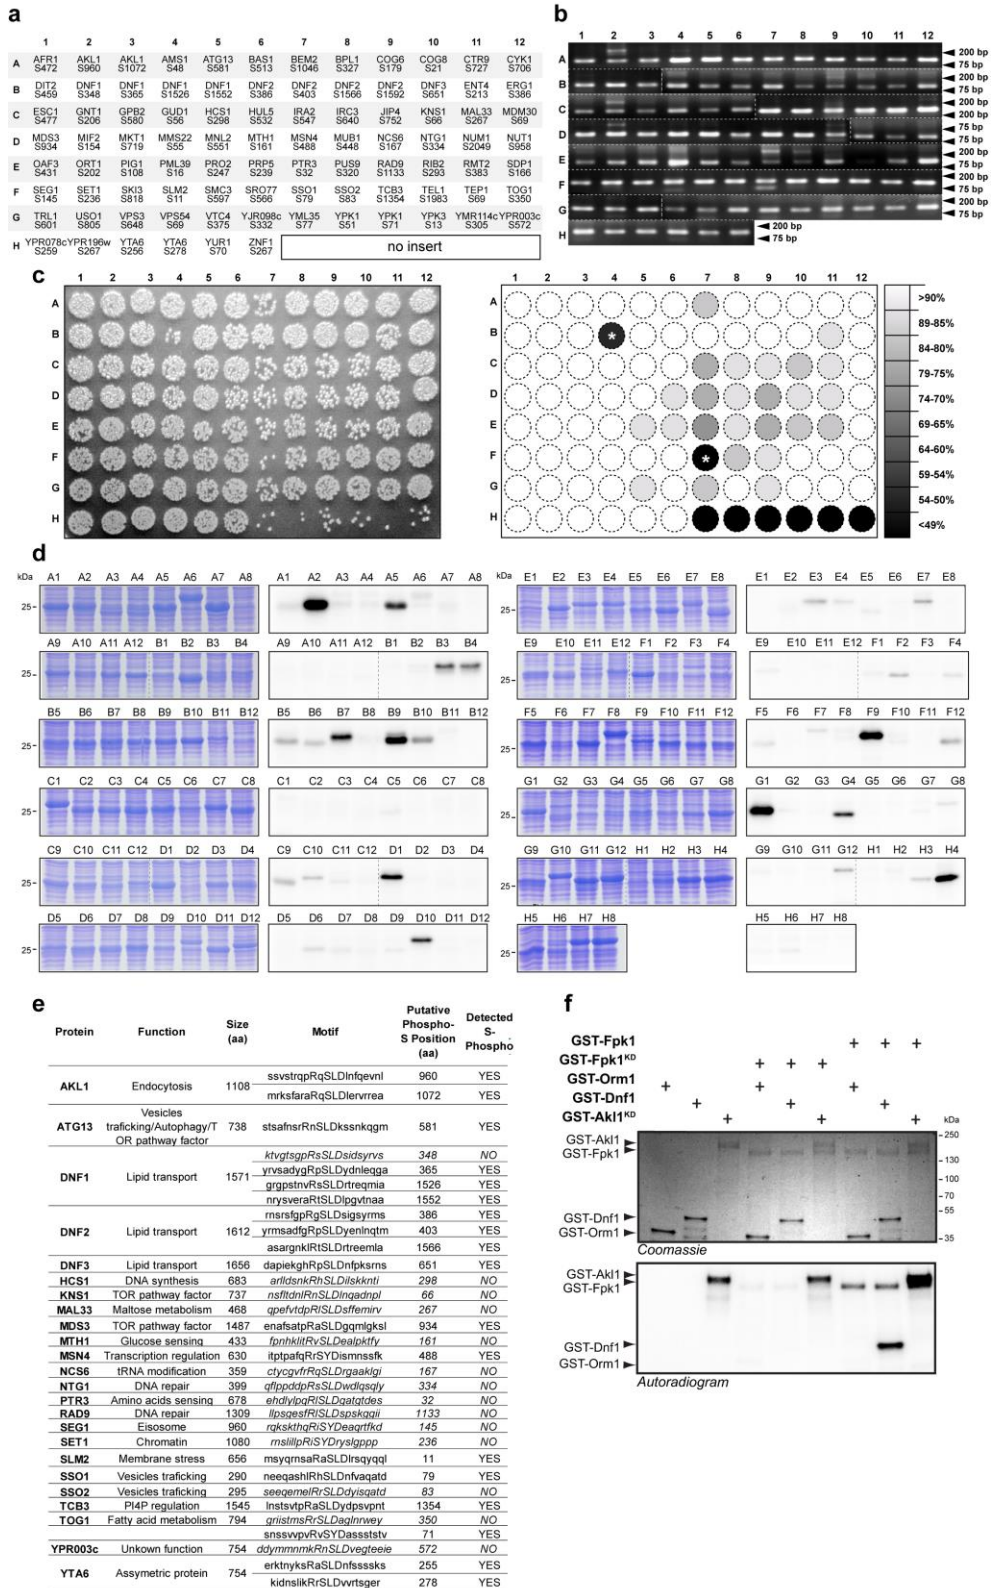

**Supplemental figure 2: Fpk1 substrate screen.** **a**, Organization of the 96-well-plate containing negative controls and the primer dimers corresponding to the 90 candidate peptide substrates. **b**, PCR products of the primer dimers analysed on 2% agarose gels **c**, Left Panel: Gibson assembly reactions were transformed into bacteria. 1/10 of the transformed cells were spotted onto LB plates containing kanamycin, including multiple negative controls corresponding to linearized vector without insert. Right Panel: Heat map reporting the cloning efficiency assessed with respect to the negative controls. The (\*) indicated failed wells in which the cloning/transformation initially failed (these were subsequently repeated, successfully). **d**, Results of the initial *in vitro* kinase assays screen. Dashed lines define splicing of the gels. Bacterial lysates containing one of the 90 candidate peptides were individually incubated with GST-Fpk1 and <sup>32</sup>P-ATP for 30 min at 30°C. Reactants were subsequently resolved by SDS-PAGE, analysed by Coomassie stain (left panel) and autoradiography (right panel). **e**, Table recapitulating the peptides identified in both the initial and secondary screens (left) **f**, *In vitro* kinase assay assessing the ability of GST-Fpk1<sup>WT/KD</sup> to phosphorylate GST-Ak11<sup>KD</sup>, GST-Orm1 (aa 1-85; negative control) or GST-Dnf1 (aa 1404-1571; positive control).

**Supplemental figure 3:**

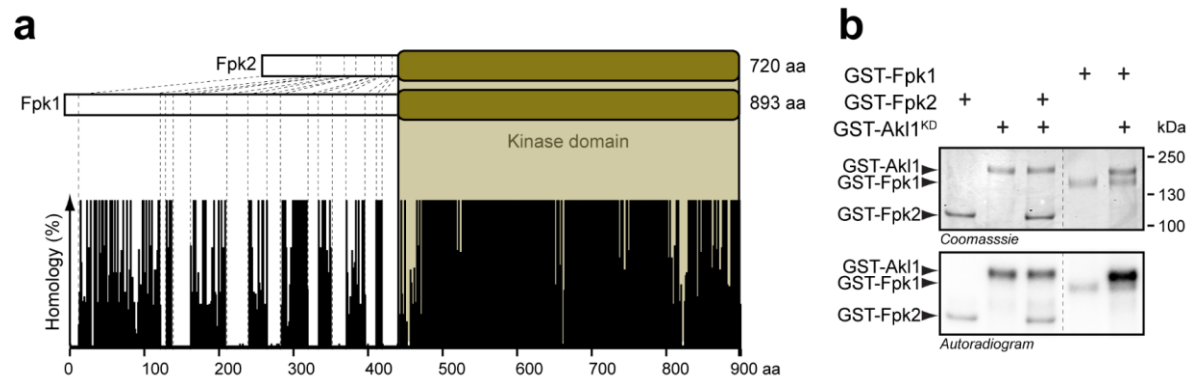

**Supplemental figure 3: Akl1 is not a target of Fpk2 *in vitro*.** **a**, ClustalX alignments of Fpk1 and Fpk2 protein sequences. The green box represents the conserved kinase domain and the dashed lines delimit sequence insertions. **b**, Coomassie blue and autoradiogram SDS-PAGE images after *in vitro* kinase assay assessing the ability of Fpk1 and Fpk2 to phosphorylate Akl1. Dashed lines define splicing of the gel.

**Supplemental figure 4**

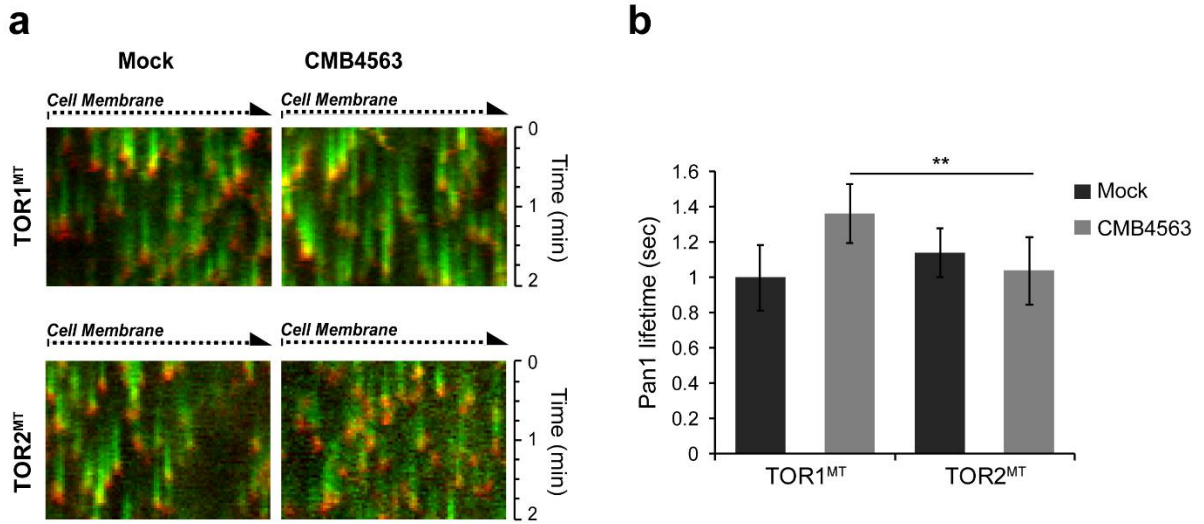

**Supplemental figure 4: The inhibition of TORC1 does not cause delay the endocytosis process.** **a**, Pan1-GFP and Abp1-mCherry kymographs were generated from  $TOR1^{MT}$  or  $TOR2^{MT}$  strains treated or not with CMB4563 for 30 min. **b**, Quantification of Pan1-GFP and Abp1-mCherry patch lifetimes determined from  $TOR1^{MT}$  or  $TOR2^{MT}$  cells as assessed in a. Bar graphs of Pan1-GFP lifetimes means, +/- standard deviation. Statistical parameters were extracted (Student's test:  $P < 0.005$ (\*\*)) based on five patches/kymograph. Five kymographs were analysed.

### Supplemental table 1

**a**

[illegible]

**b**

[illegible]

**Supplemental table 1: List of primers used for the Fpk1 substrate library.** **a**, Forward primers organized following the order found in Supp. Fig1a. The consensus motif sequence is surrounded by 5 codons unique for each peptide. **b**, Corresponding reverse primers.

## Supplemental table 2

| Protein | Function                                          | Size (aa) | Motif                                                       | Putative Phospho-S Position | Detected S-Phospho |
|---------|---------------------------------------------------|-----------|-------------------------------------------------------------|-----------------------------|--------------------|
| AFR1    | Shmoo formation                                   | 620       | <b>qppprsskRpSLDnnesaryf</b>                                | 472                         | YES                |
| AKL1    | Endocytosis                                       | 1108      | <b>ssvstrqpRgSLDlnfgevnl</b><br><b>mrksfaraRgSLDlervrea</b> | 960<br>1072                 | YES<br>YES         |
| AMS1    | Mannose metabolism                                | 1083      | <b>lpkfydkkRSLDhdhvkvvw</b>                                 | 48                          | NO                 |
| ATG13   | Vesicles trafficking/Autophagy/TOR pathway factor | 738       | <b>atsafnrRnSLDksnkgqm</b>                                  | 581                         | YES                |
| BAS1    | Purine/histidine metabolism                       | 811       | <b>sdtnpeyRtSLDnmsdfis</b>                                  | 513                         | NO                 |
| BEM2    | Cytoskeleton organisation                         | 2167      | <b>patpnqkmRSLDttgrlskt</b>                                 | 1046                        | YES                |
| BPL1    | Biotinylation                                     | 690       | <b>sfqfryqyRaSYDaasssilh</b>                                | 327                         | NO                 |
| COG6    | Vesicles trafficking                              | 839       | <b>kvleeneRSLDdqkmppe</b>                                   | 179                         | NO                 |
| COG8    | Vesicles trafficking                              | 607       | <b>ddlteegkRSLDflqdlqs</b>                                  | 21                          | NO                 |
| CTR9    | Transcription                                     | 1077      | <b>aleilrkvdSLDnedvqini</b>                                 | 727                         | NO                 |
| CYK1    | Budding                                           | 1495      | <b>afergaivReSLDqksefkyr</b>                                | 706                         | NO                 |
| DIT2    | Sporulation                                       | 489       | <b>laemkgfRvSLDpeweeklt</b>                                 | 459                         | NO                 |
| DNF1    | Lipid transport                                   | 1571      | <b>ktvatsmRSLDdaivrvs</b>                                   | 348                         | NO                 |
|         |                                                   |           | <b>yrvsadyRpSLDydnlegga</b>                                 | 365                         | YES                |
|         |                                                   |           | <b>grgptnvRSLDrtreemia</b>                                  | 1526                        | YES                |
| DNF2    | Lipid transport                                   | 1612      | <b>nrysveraRSLDlpgvtnaa</b>                                 | 1552                        | YES                |
|         |                                                   |           | <b>rnrsfupRgSLDsigyrcms</b>                                 | 386                         | YES                |
|         |                                                   |           | <b>yrmadfgRpSLDyenlqtm</b>                                  | 403                         | YES                |
| DNF3    | Lipid transport                                   | 1656      | <b>asargnkRSLDrtreemia</b>                                  | 1566                        | YES                |
|         |                                                   |           | <b>trysveraRSLDlpginhae</b>                                 | 1592                        | YES                |
| ENT4    | Trafficking                                       | 247       | <b>trntheyakfSLDlpaecde</b>                                 | 213                         | NO                 |
| ERG1    | Ergosterol metabolism                             | 496       | <b>e1ldyhfRkSYDsvinlv</b>                                   | 386                         | NO                 |
| ESC1    | Telomeres                                         | 491       | <b>epekddiRSLDknfpgnn</b>                                   | 477                         | NO                 |
| GNT1    | Glycans modifications                             | 491       | <b>yldndailRSLDeiflqny</b>                                  | 206                         | NO                 |
| GPB2    | PKA inhibitor                                     | 880       | <b>whgtelndRSLDmlinnlk</b>                                  | 580                         | NO                 |
| GUJ1    | Guanine metabolism                                | 489       | <b>ngliffvRnSLDprkdcldh</b>                                 | 56                          | NO                 |
| HCS1    | DNA synthesis                                     | 683       | <b>arildsnkRSLDlskknti</b>                                  | 298                         | NO                 |
| HUL5    | Ubiquitin/Proteasome                              | 910       | <b>efialdkRSLDdhnlnlm</b>                                   | 532                         | NO                 |
| IRA2    | cAMP metabolism                                   | 3079      | <b>qytaeqqsRaSYDahktgtg</b>                                 | 547                         | NO                 |
| IRC3    | DNA synthesis                                     | 689       | <b>qesskdfiRSLDdvtyvnt</b>                                  | 640                         | NO                 |
| JIP4    | Unknown function                                  | 876       | <b>aaigaikRnSLDspgdqqq</b>                                  | 742                         | NO                 |
| KNS1    | TOR pathway factor                                | 737       | <b>nsfltdnlRnSLDlmgadnpi</b>                                | 66                          | NO                 |
| MAL33   | Maltose metabolism                                | 468       | <b>qpefvtdpRSLDsfemirv</b>                                  | 267                         | NO                 |
| MDM30   | Ubiquitin/Proteasome                              | 598       | <b>rcydrwinReSLDiltgndyd</b>                                | 69                          | NO                 |
| MD53    | TOR pathway factor                                | 1487      | <b>enafsatpRaSLDgmlgksl</b>                                 | 934                         | YES                |
| MIF2    | Kinetochore                                       | 549       | <b>tykrkystrSLDteespvr</b>                                  | 154                         | YES                |
| MKT1    | Transcription regulation                          | 830       | <b>elscqfRnSLDnfgwarki</b>                                  | 719                         | NO                 |
| MMS22   | Ubiquitin/Proteasome                              | 1454      | <b>rsqkvteRSLDstagesct</b>                                  | 55                          | NO                 |
| MNL2    | Mannose metabolism                                | 849       | <b>tneltdvtrkSYDvslscrl</b>                                 | 551                         | NO                 |
| MTH1    | Glucose sensing                                   | 433       | <b>fqnkhliRvSLDealpktfy</b>                                 | 161                         | NO                 |
| MSN4    | Transcription regulation                          | 630       | <b>ittpafqRrSYDismnsfk</b>                                  | 488                         | YES                |
| MUB1    | Ubiquitin/Proteasome                              | 620       | <b>kisdnferRvSYDkmkelt</b>                                  | 448                         | NO                 |
| NCS6    | tRNA modification                                 | 359       | <b>ctycgvfrRgSLDrgaakgi</b>                                 | 167                         | NO                 |
| NTG1    | DNA repair                                        | 399       | <b>qflppddpRSLDwdlqsgiy</b>                                 | 334                         | NO                 |
| NUM1    | Organel migration                                 | 2748      | <b>seirdqldRpSLDvikekaa</b>                                 | 2049                        | NO                 |
| NUT1    | Transcription regulation                          | 1132      | <b>gvpgsenkRgSLDsehvdyf</b>                                 | 958                         | NO                 |
| OAF3    | Oleate metabolism                                 | 863       | <b>sfkinrhtRpSYDinkpsdyi</b>                                | 431                         | NO                 |
| ORT1    | Arginine metabolism                               | 292       | <b>ivksklkdRSLDdpkrdesk</b>                                 | 202                         | NO                 |
| PIG1    | Glycogen metabolism                               | 648       | <b>pfllggedhRySLDlidydsie</b>                               | 108                         | NO                 |
| PML39   | RNA maturation                                    | 334       | <b>levrliksRSLDpntklppg</b>                                 | 16                          | NO                 |
| PRO2    | Proline metabolism                                | 456       | <b>dadlikakRSLDaktynpaq</b>                                 | 247                         | NO                 |
| PRP5    | RNA maturation                                    | 849       | <b>semeveeiRSLDnlikqgt</b>                                  | 239                         | NO                 |
| PTR3    | Amino acids sensing                               | 678       | <b>ehdlylpgRSLDgatgdes</b>                                  | 32                          | NO                 |
| PUS9    | tRNA modification                                 | 462       | <b>khaktvfrRSLDyqtsivkc</b>                                 | 320                         | NO                 |
| RAD9    | DNA repair                                        | 1309      | <b>lpsgesRSLDspkskggii</b>                                  | 1133                        | NO                 |
| RIB2    | tRNA modification                                 | 591       | <b>khaktvfrRSLDyqtsivkc</b>                                 | 293                         | NO                 |
| RM2     | Translation regulation                            | 412       | <b>ygmcdyRySLDdegldwnd</b>                                  | 383                         | NO                 |
| SDP1    | Slt2 phosphatase regulation                       | 209       | <b>mkynhliRSLDnllksradk</b>                                 | 166                         | NO                 |
| SEG1    | Eisosome                                          | 960       | <b>rgksklhgRSLDdeagrtfd</b>                                 | 145                         | NO                 |
| SET1    | Chromatin                                         | 1080      | <b>rnslilpRSLDyryslgppp</b>                                 | 236                         | NO                 |
| SK13    | RNA degradation                                   | 1432      | <b>igivevmaRSLDlysggtli</b>                                 | 818                         | NO                 |
| SLM2    | Membrane stress                                   | 656       | <b>msyqnsaRSLDlrsqyqql</b>                                  | 11                          | YES                |
| SMC3    | Mitosis                                           | 1230      | <b>rvtlflpRSLDsdvknpan</b>                                  | 597                         | NO                 |
| SRO77   | Vesicles trafficking                              | 1010      | <b>dalgklfRSLDdsaktild</b>                                  | 566                         | NO                 |
| SSO1    | Vesicles trafficking                              | 290       | <b>neeqashlRSLDnfvagatd</b>                                 | 79                          | YES                |
| SSO2    | Vesicles trafficking                              | 295       | <b>seeqameRSLDdyisqatd</b>                                  | 83                          | NO                 |
| TCB3    | PI4P regulation                                   | 1545      | <b>lnstsvtpRSLDydpvnt</b>                                   | 1354                        | YES                |
| TEL1    | Telomeres                                         | 2787      | <b>htlmvlsRSLDenvkcsky</b>                                  | 1983                        | NO                 |
| TEP1    | PI3P Phosphatase                                  | 434       | <b>ntypklyRSLDdlilfltv</b>                                  | 69                          | NO                 |
| TOG1    | Fatty acid metabolism                             | 794       | <b>grlistmaRSLDaglnrwey</b>                                 | 350                         | NO                 |
| TRL1    | tRNA modification                                 | 827       | <b>ddetietaRSLDyktvrvki</b>                                 | 601                         | NO                 |
| USO1    | Vesicles trafficking                              | 1790      | <b>ietelknvRSLDdmtglrdv</b>                                 | 805                         | NO                 |
| VP53    | Vesicles trafficking/Vacuole                      | 1011      | <b>rtivdmfRSLDliraini</b>                                   | 648                         | NO                 |
| VP54    | Protein recycling                                 | 889       | <b>tpxrarsaRSLDsltprraf</b>                                 | 69                          | YES                |
| VTG4    | Vesicles trafficking/Vacuole                      | 721       | <b>qipgdarRSLDltdlrmv</b>                                   | 375                         | NO                 |
| YJR098c | Unknown function                                  | 656       | <b>vqgfydwRSLDlsakhlit</b>                                  | 332                         | NO                 |
| YML35   | Translation regulation                            | 367       | <b>pehldelfRSLDyflqgrsk</b>                                 | 77                          | NO                 |
| YPK1    | TOR pathway factor                                | 680       | <b>gehdsasRSLDdrktgtnps</b>                                 | 51                          | YES                |
| YPK3    | TOR pathway factor                                | 525       | <b>snsvvrvRSLDdassatav</b>                                  | 71                          | YES                |
| YMR114C | Unknown function                                  | 368       | <b>fnqkkslRSLDydlkneeq</b>                                  | 305                         | YES                |
| YPR003c | Unknown function                                  | 754       | <b>ddymmnkRSLDvegteie</b>                                   | 572                         | NO                 |
| YPR078c | Unknown function                                  | 372       | <b>tlkryrvktSLDlmigekss</b>                                 | 259                         | NO                 |
| YPR196w | Unknown function                                  | 470       | <b>gpeivtdsRSLDslflevikv</b>                                | 267                         | NO                 |
| YTA6    | Assymetric protein                                | 754       | <b>erktnyksRSLDnfsfssks</b>                                 | 255                         | YES                |
| YUR1    | Protein modification                              | 428       | <b>yfpkvklsRSLDvrtager</b>                                  | 278                         | YES                |
| ZFN1    | Respiratory transition                            | 465       | <b>qpefvtdpRSLDsfemirv</b>                                  | 267                         | NO                 |

**Supplemental table 2: Table recapitulating all the peptides containing one or more RXSLD/E motif(s) in the *Saccharomyces Cerevisiae* proteome.** The table provides (from the left to the right) the name of the protein, its function, its length in amino acids (aa), the sequence used for cloning i.e. the consensus motif surrounded by 5 aa on both sides, the position(s) in the sequence of the serine (S) present in the consensus motif, and whether this motif was phosphorylated *in vitro*.

## REFERENCE

- Hoepfner, D., Helliwell, S. B., Sadlish, H., Schuierer, S., Filipuzzi, I., Brachat, S., Bhullar, B., Plikat, U., Abraham, Y., Altorfer, M., Aust, T., Baeriswyl, L., Cerino, R., Chang, L., Estoppey, D., Eichenberger, J., Frederiksen, M., Hartmann, N., Hohendahl, A., Knapp, B., Krastel, P., Melin, N., Nigsch, F., Oakeley, E. J., Petitjean, V., Petersen, F., Riedl, R., Schmitt, E. K., Staedtler, F., Studer, C., Tallarico, J. A., Wetzel, S., Fishman, M. C., Porter, J. A., and Movva, N. R. (2014) High-resolution chemical dissection of a model eukaryote reveals targets, pathways and gene functions. *Microbiol Res* 169, 107-120
